# Supplementary material for: Quantitative analysis of biosurfactants in water samples by a modified oil spreading technique
Source: Royal Society of Chemistry journal article supplement (doi:10.1039/d3ra00102d), 2023-01-01
Supplement: d3ra00102d1.pdf [file d3ra00102d1.pdf]

# **Quantitative analysis of biosurfactants in water samples by a modified oil spreading technique**

Haoshuai Li <sup>a, b</sup>, Chao Fang <sup>b</sup>, Xinrui Liu <sup>b</sup>, Kaiwen Bao <sup>c</sup>, Yang Li <sup>d</sup>, Mutai Bao <sup>a, b\*</sup>

<sup>a</sup> *Frontiers Science Center for Deep Ocean Multispheres and Earth System, and Key Laboratory of Marine Chemistry Theory and Technology, Ministry of Education, Ocean University of China, Qingdao 266100, China,*

<sup>b</sup> *College of Chemistry and Chemical Engineering, Ocean University of China, Qingdao 266100, China,*

<sup>c</sup> *University of Leeds, LS2 9JT, United Kingdom*

<sup>d</sup> *China Petrochemical Corporation (Sinopec Group), Beijing 100728, China*

---

\* Corresponding author: mtbao@ouc.edu.cn (M. Bao), Tel/Fax: +86-532-66782509.

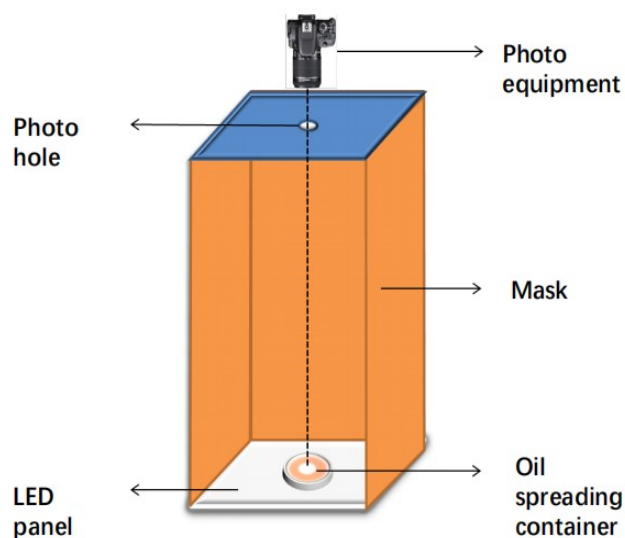

**Figure S1. Improved image acquisition device for oil spreading technique**

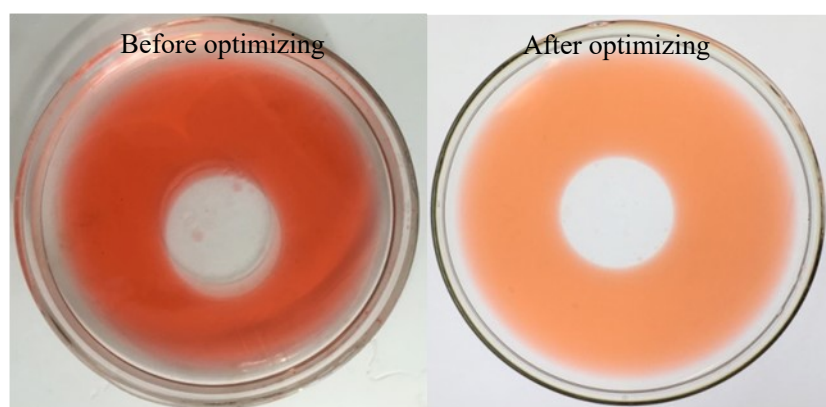

**Figure S2. Before and after the optimization of the oil spreading image**

**Table S1 Molecular weights of different components in standard lipopeptide solution**

|                     |     |      |     |      |      |      |      |      |      |
|---------------------|-----|------|-----|------|------|------|------|------|------|
| Retention time /min | 6.1 | 6.8  | 7.4 | 8.1  | 8.5  | 9.3  | 10.0 | 10.8 | 11.2 |
| Molecular weight /D | 993 | 1007 | 993 | 1021 | 1021 | 1035 | 1021 | 1035 | 1049 |

**Table S2 The area of oil spreading formed by oilfield produced and injection water and oilfield produced and injectionwater with standard biosurfactants**

|                        |                                      |                                      |                                      |                                             |                                              |                                              |
|------------------------|--------------------------------------|--------------------------------------|--------------------------------------|---------------------------------------------|----------------------------------------------|----------------------------------------------|
| Oilfield water samples | Parallel sample 1 (cm <sup>2</sup> ) | Parallel sample 2 (cm <sup>2</sup> ) | Parallel sample 3 (cm <sup>2</sup> ) | Standard deviation between parallel samples | Oilfield water+100 mg/L rhamnolipid standard | Oilfield water+100 mg/L lipopeptide standard |
|------------------------|--------------------------------------|--------------------------------------|--------------------------------------|---------------------------------------------|----------------------------------------------|----------------------------------------------|

|                                                |       |       |       |      | solution (c<br>m <sup>2</sup> ) | solution (<br>cm <sup>2</sup> ) |
|------------------------------------------------|-------|-------|-------|------|---------------------------------|---------------------------------|
| Oilfield<br>produced<br>water<br>samples area  | 101.6 | 83.8  | 71.1  | 12.5 | 1223.7                          | 738.8                           |
| Oilfield<br>injection<br>water<br>samples area | 229.6 | 204.3 | 212.7 | 10.5 | 1613.4                          | 1013.6                          |
